# Supplementary material for: In vivo assembly and trafficking of olfactory Ionotropic Receptors
Source: PubMed Central journal article supplement (PMC6472016; doi:10.1186/s12915-019-0651-7), 2019-04-17

Figure S3

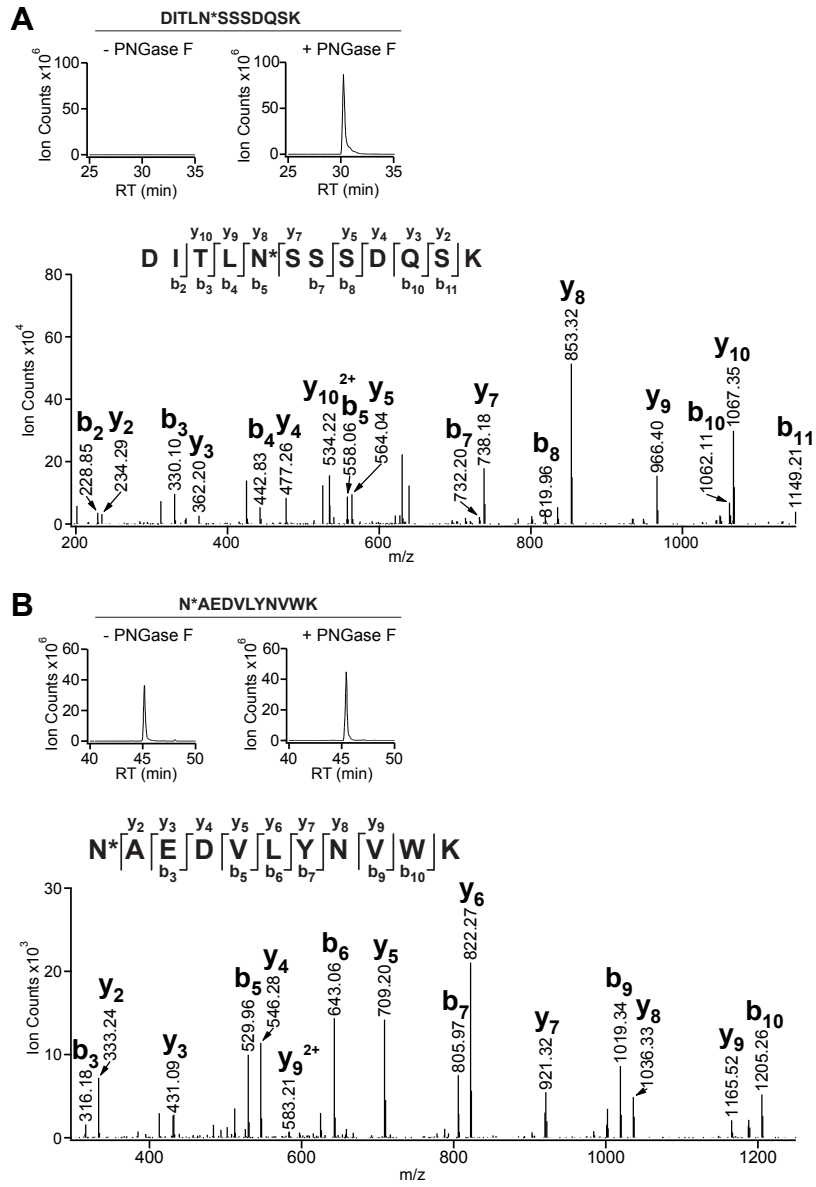

Supplement: 12915_2019_651_MOESM3_ESM.pdf [file 12915_2019_651_MOESM3_ESM.pdf]
